# Supplementary material
Source: MDPI journal article supplement (https://www.mdpi.com/1424-8247/17/5/640)
Supplement: s1 [file s1]

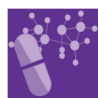

## Supplementary Material

**Table S1.** Predicted and observed values for pharmacokinetic parameters of hydromorphone. Predicted values are shown as the median of population simulations.

| Study                   | Protocols   | Methods   | C <sub>max</sub> /C <sub>max-ss</sub> (ng/mL) | AUC/AUC <sub>ss</sub> (ng*h/mL) | T <sub>max</sub> (h) |
|-------------------------|-------------|-----------|-----------------------------------------------|---------------------------------|----------------------|
| Angst 2001              | 8 mg IR SD  | Predicted | 3.86                                          | 19.2                            | 0.80                 |
|                         |             | Observed  | 4.74±1.76                                     | 18.0                            | 0.80                 |
|                         |             | FE        | 0.81                                          | 1.07                            | 1.00                 |
|                         | 8 mg ER SD  | Predicted | 0.71                                          | 19.5                            | 14.8                 |
|                         |             | Observed  | 0.77±0.33                                     | 22.9                            | 12.0                 |
|                         |             | FE        | 0.92                                          | 0.85                            | 1.23                 |
|                         | 16 mg ER SD | Predicted | 1.42                                          | 38.9                            | 14.9                 |
|                         |             | Observed  | 1.45±0.43                                     | 43.6                            | 15.0                 |
|                         |             | FE        | 0.98                                          | 0.89                            | 0.99                 |
|                         | 32 mg ER SD | Predicted | 2.84                                          | 77.8                            | 14.8                 |
|                         |             | Observed  | 2.41±0.85                                     | 81.0                            | 16.5                 |
|                         |             | FE        | 1.18                                          | 0.96                            | 0.90                 |
| Sathyan 2007            | 8 mg ER SD  | Predicted | 0.71                                          | 19.5                            | 14.8                 |
|                         |             | Observed  | 0.93±1.01                                     | 19.5                            | 12.0                 |
|                         |             | FE        | 0.76                                          | 1.00                            | 1.23                 |
|                         | 16 mg ER SD | Predicted | 1.42                                          | 38.9                            | 14.9                 |
|                         |             | Observed  | 1.69±0.78                                     | 40.8                            | 16.0                 |
|                         |             | FE        | 0.84                                          | 0.95                            | 0.93                 |
|                         | 32 mg ER SD | Predicted | 2.84                                          | 77.8                            | 14.8                 |
|                         |             | Observed  | 3.25±1.37                                     | 80.3                            | 16.0                 |
|                         |             | FE        | 0.87                                          | 0.97                            | 0.93                 |
|                         | 64 mg ER SD | Predicted | 8.02                                          | 231                             | 15.4                 |
|                         |             | Observed  | 6.61±1.75                                     | 179                             | 16.0                 |
|                         |             | FE        | 1.21                                          | 1.29                            | 0.96                 |
| Sathyan 2007<br>fasting | 16 mg ER SD | Predicted | 1.42                                          | 38.9                            | 14.9                 |
|                         |             | Observed  | 1.11±0.21                                     | 38.8                            | 16.0                 |
|                         |             | FE        | 1.28                                          | 1.00                            | 0.93                 |
| Sathyan 2008            | 16 mg ER SD | Predicted | 1.42                                          | 38.9                            | 14.9                 |
|                         |             | Observed  | 1.37±0.32                                     | 40.6                            | 16.0                 |
|                         |             | FE        | 1.04                                          | 0.96                            | 0.93                 |
| Turgeon 2010            | 16 mg ER QD | Predicted | 2.09                                          | 37.3                            | 85.1                 |
|                         |             | Observed  | 2.32                                          | /                               | 84.0                 |
|                         |             | FE        | 0.90                                          | /                               | 1.01                 |
|                         | 4 mg IR q6h | Predicted | 2.95                                          | 9.44                            | 90.8                 |
|                         |             | Observed  | 2.35                                          | /                               | 79.0                 |
|                         |             | FE        | 1.25                                          | /                               | 1.15                 |

|  |      |      |      |      |
|--|------|------|------|------|
|  | GMFE | 1.17 | 1.08 | 1.09 |
|--|------|------|------|------|

IR: Immediate release; ER: Extended release; SD: Single dose; FE: Fold error; GMFE: Geometric mean fold error.

**Table S2.** Predicted and observed values for pharmacokinetic parameters of hydrocodone. Predicted values are shown as the median of population simulations.

| Study        | Protocols         | Methods   | C <sub>max</sub> /C <sub>max-ss</sub> (ng/mL) |      | AUC/AUC <sub>ss</sub> (ng*h/mL) |      | T <sub>max</sub> (h) |      |
|--------------|-------------------|-----------|-----------------------------------------------|------|---------------------------------|------|----------------------|------|
|              |                   |           | HYD                                           | HYM  | HYD                             | HYM  | HYD                  | HYM  |
| Hao 2011     | 5 mg uncoated SD  | Predicted | 9.76                                          | 0.10 | 63.1                            | 1.09 | 0.80                 | 1.20 |
|              |                   | Observed  | 14.5                                          | 0.15 | 91.9                            | 1.46 | 0.83                 | 0.79 |
|              |                   | FE        | 0.67                                          | 0.67 | 0.69                            | 0.75 | 0.96                 | 1.51 |
| Harris 2016  | 60 mg uncoated SD | Predicted | 117                                           | /    | 762                             | /    | 0.80                 | /    |
|              |                   | Observed  | 106                                           | /    | 918                             | /    | 1.60                 | /    |
|              |                   | FE        | 1.10                                          | /    | 0.83                            | /    | 0.50                 | /    |
| Darwish 2016 | 15 mg ER SD       | Predicted | 10.3                                          | /    | 193                             | /    | 8.40                 | /    |
|              |                   | Observed  | 10.1                                          | /    | 155                             | /    | 6.00                 | /    |
|              |                   | FE        | 1.02                                          |      | 1.24                            |      | 1.40                 | /    |
|              | 45 mg ER SD       | Predicted | 31.0                                          | /    | 580                             | /    | 8.40                 | /    |
|              |                   | Observed  | 28.6                                          | /    | 565                             | /    | 8.00                 | /    |
|              |                   | FE        | 1.08                                          | /    | 1.03                            | /    | 1.05                 | /    |
| Darwish 2015 | 15 mg ER SD       | Predicted | 10.3                                          | /    | 193                             | /    | 8.40                 | /    |
|              |                   | Observed  | 12.6                                          | /    | 199                             | /    | 7.00                 | /    |
|              |                   | FE        | 0.82                                          | /    | 0.97                            | /    | 1.20                 |      |
|              | 30 mg ER SD       | Predicted | 20.7                                          | /    | 387                             | /    | 8.40                 | /    |
|              |                   | Observed  | 20.7                                          | /    | 382                             | /    | 8.00                 | /    |
|              |                   | FE        | 1.00                                          | /    | 1.01                            | /    | 1.05                 | /    |
|              | 45 mg ER SD       | Predicted | 31.0                                          | /    | 580                             | /    | 8.40                 | /    |
|              |                   | Observed  | 30.3                                          | /    | 592                             | /    | 8.00                 | /    |
|              |                   | FE        | 1.02                                          | /    | 0.98                            | /    | 1.05                 | /    |
|              | 60 mg ER SD       | Predicted | 41.1                                          | /    | 772                             | /    | 8.40                 | /    |
|              |                   | Observed  | 41.2                                          | /    | 766                             | /    | 8.00                 | /    |
|              |                   | FE        | 1.00                                          | /    | 1.01                            | /    | 1.05                 | /    |
|              | 90 mg ER SD       | Predicted | 62.0                                          | /    | 1159                            | /    | 8.40                 | /    |
|              |                   | Observed  | 62.5                                          | /    | 1189                            | /    | 8.00                 | /    |
|              |                   | FE        | 0.99                                          | /    | 0.97                            | /    | 1.05                 | /    |
| Farr 2015    | 20 mg ER SD       | Predicted | 13.8                                          | /    | 258                             | /    | 8.40                 | /    |
|              |                   | Observed  | 22.7                                          | /    | 345                             | /    | 8.00                 | /    |
|              |                   | FE        | 0.60                                          | /    | 0.75                            | /    | 1.05                 | /    |
|              | 50 mg ER SD       | Predicted | 34.5                                          | /    | 645                             | /    | 8.40                 | /    |
|              |                   | Observed  | 46.3                                          | /    | 846                             | /    | 6.16                 | /    |
|              |                   | FE        | 0.75                                          | /    | 0.76                            | /    | 1.36                 | /    |
| Kapil 2015   | 20 mg ER SD       | Predicted | 11.3                                          | 0.15 | 258                             | 4.37 | 14.6                 | 15.6 |

|              |                   |           |      |      |      |      |       |      |
|--------------|-------------------|-----------|------|------|------|------|-------|------|
| Darwish 2014 | EM                | Observed  | 15.9 | 0.19 | 328  | 3.80 | 18.0  | 16.1 |
|              |                   | FE        | 0.71 | 0.79 | 0.79 | 1.15 | 0.81  | 0.97 |
|              | 20 mg ER SD<br>PM | Predicted | 11.6 | 0.02 | 269  | 0.75 | 14.60 | 15.8 |
|              |                   | Observed  | 16.8 | 0.06 | 347  | 0.64 | 18.0  | 18.0 |
|              |                   | FE        | 0.69 | 0.33 | 0.78 | 1.17 | 0.81  | 0.88 |
|              | 45 mg ER SD       | Predicted | 31.0 | /    | 580  | /    | 8.40  | /    |
|              |                   | Observed  | 29.0 | /    | 568  | /    | 8.50  | /    |
|              |                   | FE        | 1.07 | /    | 1.02 | /    | 0.99  | /    |
|              | 45 mg ER BID      | Predicted | 53.4 | /    | 580  | /    | 8.60  | /    |
|              |                   | Observed  | 63.8 | /    | 663  | /    | 4.70  | /    |
|              |                   | FE        | 0.84 | /    | 0.87 | /    | 1.83  | /    |
|              | 90 mg ER SD       | Predicted | 62.0 | /    | 1159 | /    | 8.40  | /    |
|              |                   | Observed  | 56.4 | /    | 1073 | /    | 7.00  | /    |
|              |                   | FE        | 1.10 | /    | 1.08 | /    | 1.20  | /    |
|              | 90 mg ER BID      | Predicted | 106  | /    | 1163 | /    | 8.40  | /    |
|              |                   | Observed  | 123  | /    | 1282 | /    | 5.0   | /    |
|              |                   | FE        | 0.86 | /    | 0.91 | /    | 1.68  | /    |
|              | GMFE              | 1.18      | 1.79 | 1.16 | 1.22 | 1.23 | 1.21  |      |

HYD: Hydrocodone; HYM: Hydromorphone; ER: Extended release; SD: Singe dose; FE: Fold error; GMFE: Geometric mean fold error.

**Table S3.** Clinical pharmacokinetic reports used in hydromorphone PBPK modeling.

| Study          | Dosage                 | Ethnicity | Population | Age, mean(range) | Number of sub-<br>jects | Females pro-<br>portion |
|----------------|------------------------|-----------|------------|------------------|-------------------------|-------------------------|
| Coda 1996      | 10 µg/kg iv            | American  | Healthy    | 27(21-38)        | 10                      | 0                       |
|                | 20 µg/kg iv            | American  | Healthy    | 27(21-38)        | 10                      | 0                       |
|                | 40 µg/kg iv            | American  | Healthy    | 27(21-38)        | 10                      | 0                       |
| Angst 2001     | 8 mg IR SD             | American  | Healthy    | 27(21-34)        | 12                      | 50%                     |
|                | 8 mg ER SD             | American  | Healthy    | 27(21-34)        | 12                      | 50%                     |
|                | 16 mg ER SD            | American  | Healthy    | 27(21-34)        | 12                      | 50%                     |
|                | 32 mg ER SD            | American  | Healthy    | 27(21-34)        | 12                      | 50%                     |
| Sathyan 2007-1 | 8 mg ER SD             | American  | Healthy    | 33(20-50)        | 8                       | 37.5%                   |
|                | 16 mg ER SD            | American  | Healthy    | 33(20-50)        | 8                       | 37.5%                   |
|                | 32 mg ER SD            | American  | Healthy    | 33(20-50)        | 8                       | 37.5%                   |
|                | 64 mg ER SD            | American  | Healthy    | 33(20-50)        | 8                       | 37.5%                   |
| Sathyan 2007-2 | 16 mg ER SD<br>fasting | American  | Healthy    | 33.1(19-49)      | 30                      | 30%                     |
| Sathyan 2008   | 16 mg ER SD            | American  | Healthy    | 21-45            | 24                      | NR                      |
| Turgeon 2010   | 16 mg ER QD            | American  | Healthy    | NR               | 18                      | NR                      |
|                | 4 mg IR q6h            | American  | Healthy    | NR               | 18                      | NR                      |

iv: intravenous; IR: Immediate release; ER: Extended release; SD: Singe dose; NR: Not reported.

**Table S4.** Clinical pharmacokinetic reports used in hydrocodone PBPK modeling.

| Study        | Dosage                  | Ethnicity | Population | Age, mean(range) | Number of subjects | Females proportion |
|--------------|-------------------------|-----------|------------|------------------|--------------------|--------------------|
| Hao 2011     | 5 mg uncoated SD        | Chinese   | Healthy    | NR               | 12                 | NR                 |
| Harris 2016  | 60 mg uncoated SD       | American  | Healthy    | 38.9(21-54)      | 25                 | NR                 |
| Darwish 2016 | 15 mg ER SD             | American  | Healthy    | 49(41-59)        | 8                  | 37%                |
|              | 45 mg ER SD             | American  | Healthy    | 59.5(42-70)      | 14                 | 43%                |
| Darwish 2015 | 15 mg ER SD             | American  | Healthy    | 28.5(19-45)      | 60                 | 34%                |
|              | 30 mg ER SD             | American  | Healthy    | 28.5(19-45)      | 60                 | 34%                |
|              | 45 mg ER SD             | American  | Healthy    | 28.5(19-45)      | 60                 | 34%                |
|              | 60 mg ER SD             | American  | Healthy    | 28.5(19-45)      | 60                 | 34%                |
|              | 90 mg ER SD             | American  | Healthy    | 28.5(19-45)      | 60                 | 34%                |
| Farr 2015    | 20 mg ER SD             | American  | Healthy    | 22(19-33)        | 12                 | 75%                |
|              | 50 mg ER SD             | American  | Healthy    | 32(22-44)        | 30                 | 7%                 |
| Kapil 2015   | 20 mg ER SD             | American  | Healthy    | 36(18-50)        | 24                 | 50%                |
|              | 20 mg ER SD+ Paroxetine | American  | Healthy    | 36(18-50)        | 24                 | 50%                |
| Darwish 2014 | 45 mg ER SD             | American  | Healthy    | 26.5(20-45)      | 40                 | 33%                |
|              | 45 mg ER BID            | American  | Healthy    | 26.5(20-45)      | 40                 | 33%                |
|              | 90 mg ER SD             | American  | Healthy    | 28(20-44)        | 40                 | 23%                |
|              | 90 mg ER BID            | American  | Healthy    | 28(20-44)        | 40                 | 23%                |

iv: intravenous; IR: Immediate release; ER: Extended release; SD: Single dose; NR: Not reported.

**Table S5.** Input compound parameters for the fentanyl, alfentanil, and sufentanil PBPK models.

| Parameters                         | Fentanyl                           | Alfentanil     | Sufentanil     |
|------------------------------------|------------------------------------|----------------|----------------|
| Lipophilicity                      | 3.49                               | 1.85           | 2.90           |
| plasma fraction unbound            | 0.208                              | 0.10           | 0.08           |
| MW                                 | 336.48 g/mol                       | 416.52 g/mol   | 386.60 g/mol   |
| pKa                                | 8.99                               | 6.50           | 8.00           |
| solubility                         | Various values provided in a table | 0.992 mg/mL    | 8.0E-5 mg/mL   |
| partition coefficients calculation | Diverse                            | Diverse        | Diverse        |
| cellular permeability              | 0.06 cm/min                        | 6.88E-3 cm/min | 6.78E-3 cm/min |
| Unspecific hepatic clearance       | 1.46 1/min                         | NA             | NA             |
| GFR fraction                       | 1.0                                | 0.06           | 1.0            |
| K <sub>m,CYP3A4</sub>              | 117 µmol/L, 82 µmol/L              | NA             | NA             |
| K <sub>cat,CYP3A4</sub>            | 20.6 1/min, 4.7 1/min              | NA             | NA             |
| K <sub>m,CYP3A7</sub>              | 596 µmol/L                         | NA             | NA             |
| K <sub>cat,CYP3A7</sub>            | 5.22 1/min                         | NA             | NA             |
| K <sub>m,P-gp</sub>                | 5.72 µmol/L                        | NA             | NA             |
| K <sub>cat,P-gp</sub>              | 1.71 1/min                         | NA             | NA             |
| CYP3A4 specific clearance          | NA                                 | 0.34 1/min     | 6.11 1/min     |

MW: molecular weight; pKa: acid dissociation constant; GFR: glomerular filtration; Km: Michaelis-Menten constant; kcat:  $V_{\max}$  per recombinant enzyme.

The model files of the above compounds are publicly available at the Open Systems Pharmacology repository on Github (<https://github.com/Open-Systems-Pharmacology?page=1>).

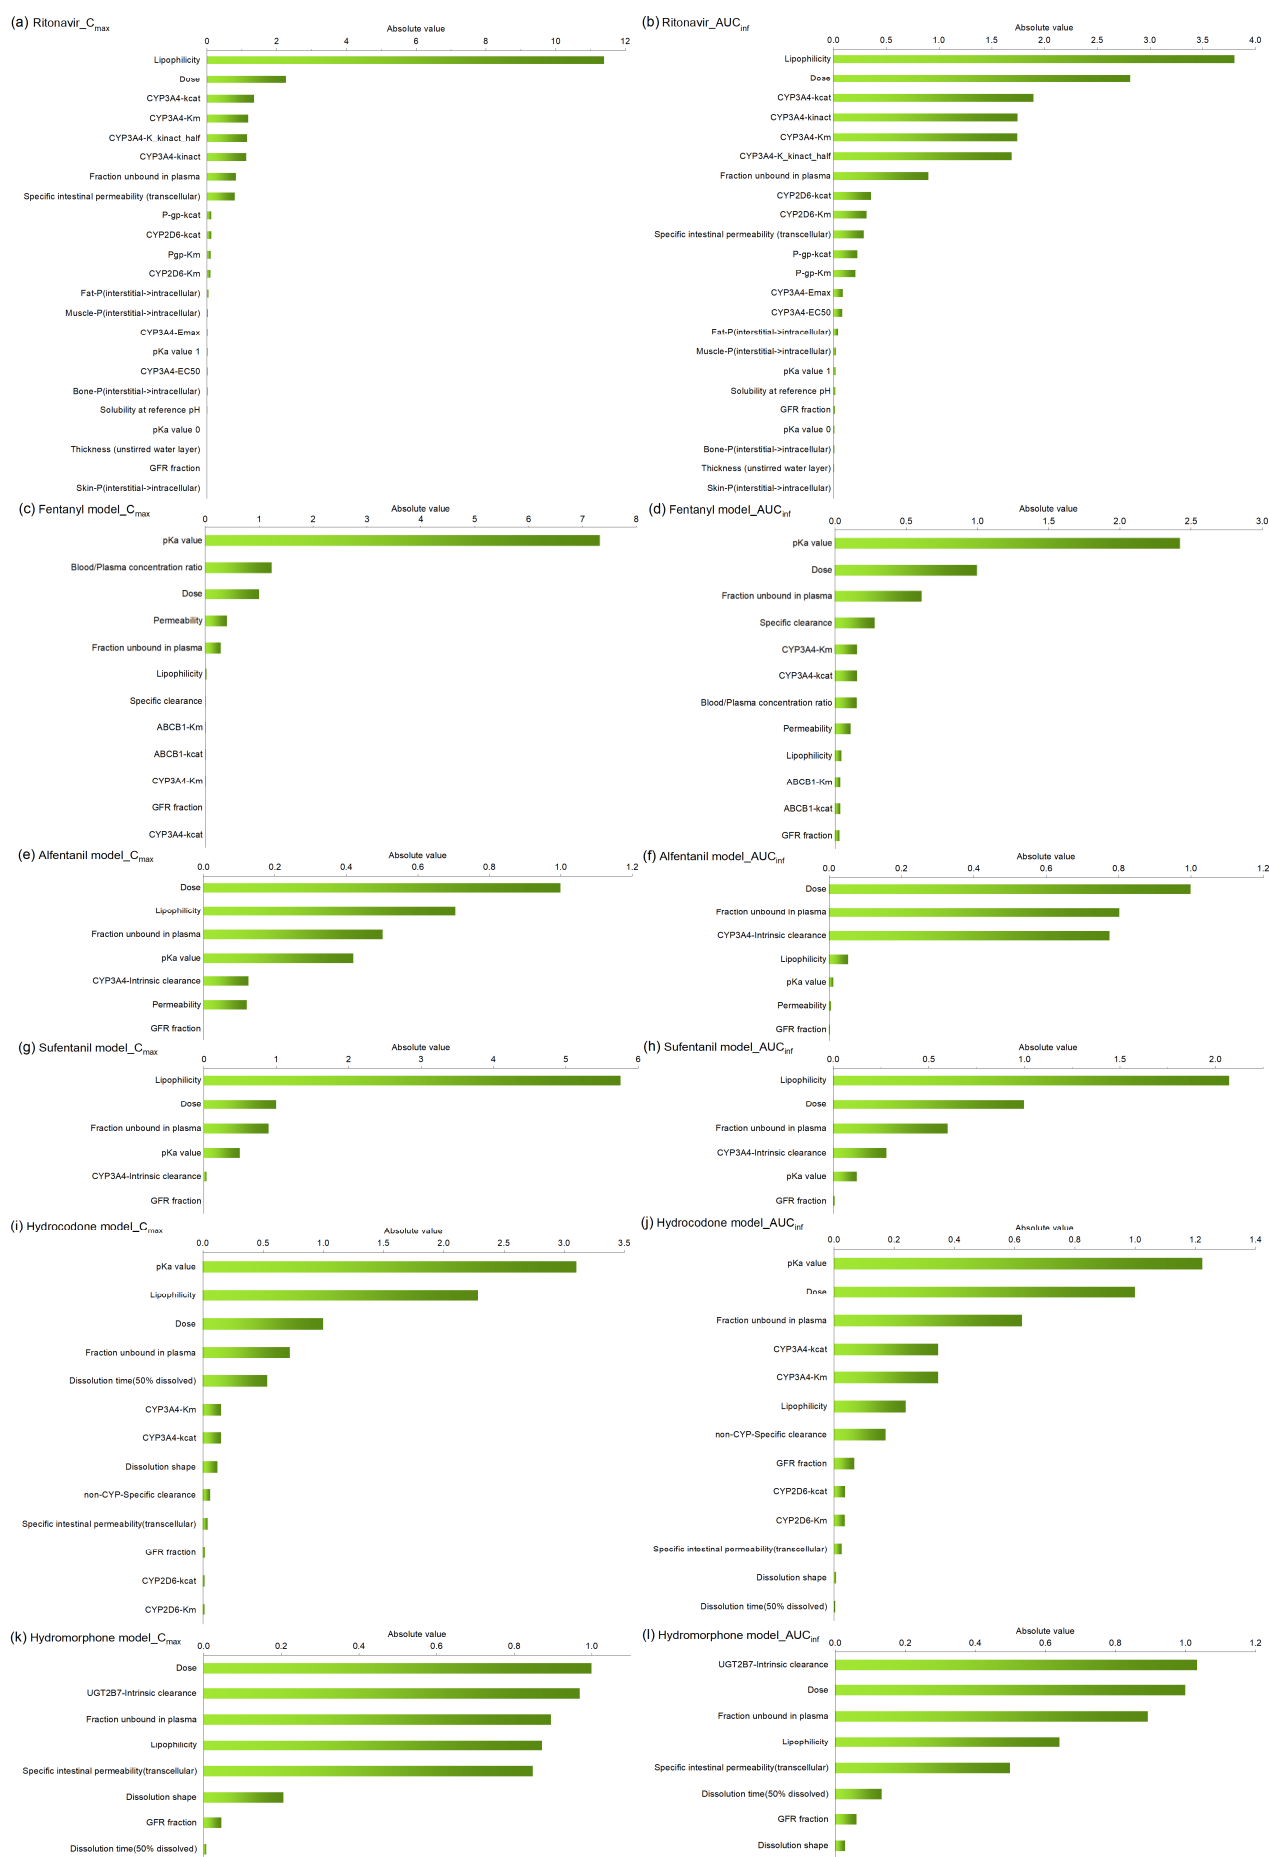

**Figure S1.** The sensitivity analysis for PBPK models used in this study. Sensitivity of the final model was measured as the relative change of a specific pharmacokinetic parameter after a single intravenous dose of fentanyl analogs or a single oral dose of ritonavir/hydrocodone/hydromorphone. A sensitivity value of +1.0 denotes that a 10% increase in the examined parameter causes a 10% increase in the pharmacokinetic parameter. The sensitivity values are presented as absolute values in figures.

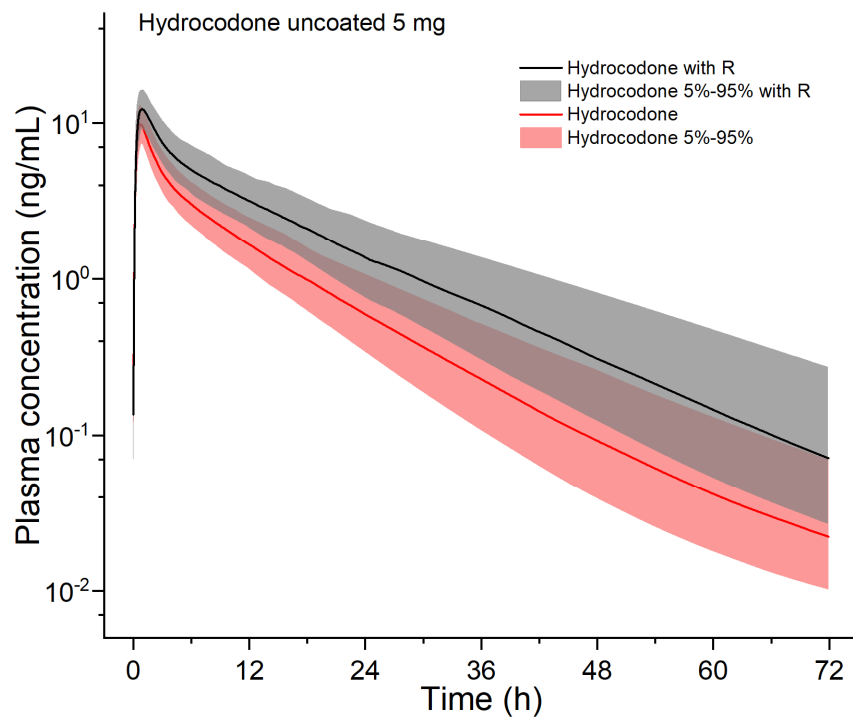

**Figure S2.** Simulated concentrations of a single-dose hydrocodone uncoated tablet in the presence of ritonavir.
